# Supplementary material
Source: PubMed Central journal article supplement (PMC1664695)
Supplement: pcbi.0020150.st001.pdf [file pcbi.0020150.st001.pdf]

## IFW Distances

Supplementary Table S1 – IFW distances

### Upstream\_2\_bp

|    | hs     | mm     | cf     | md     | gg     | xt     | dr     | tn     | ci     | cs     | dm     | ag     |
|----|--------|--------|--------|--------|--------|--------|--------|--------|--------|--------|--------|--------|
| mm | 0.0755 |        |        |        |        |        |        |        |        |        |        |        |
| cf | 0.0546 | 0.1005 |        |        |        |        |        |        |        |        |        |        |
| md | 0.1774 | 0.1669 | 0.1846 |        |        |        |        |        |        |        |        |        |
| gg | 0.2112 | 0.1965 | 0.2338 | 0.3356 |        |        |        |        |        |        |        |        |
| xt | 0.3298 | 0.2766 | 0.3380 | 0.3732 | 0.2450 |        |        |        |        |        |        |        |
| dr | 0.4411 | 0.4292 | 0.4178 | 0.5588 | 0.2941 | 0.2642 |        |        |        |        |        |        |
| tn | 0.3072 | 0.3235 | 0.3000 | 0.4846 | 0.2864 | 0.4059 | 0.2550 |        |        |        |        |        |
| ci | 0.6311 | 0.6167 | 0.6052 | 0.7622 | 0.6043 | 0.5242 | 0.3403 | 0.3988 |        |        |        |        |
| cs | 0.5384 | 0.5546 | 0.5066 | 0.6592 | 0.5357 | 0.4631 | 0.2717 | 0.3373 | 0.1030 |        |        |        |
| dm | 0.4681 | 0.4667 | 0.4449 | 0.5907 | 0.4142 | 0.4536 | 0.2355 | 0.2414 | 0.2389 | 0.2256 |        |        |
| ag | 0.5143 | 0.5629 | 0.4965 | 0.6651 | 0.5203 | 0.6264 | 0.3828 | 0.3112 | 0.2389 | 0.2494 | 0.1750 |        |
| ce | 0.4963 | 0.5535 | 0.4700 | 0.6228 | 0.5613 | 0.6831 | 0.4787 | 0.2948 | 0.4037 | 0.3467 | 0.3021 | 0.2538 |

### Intergenic\_2\_bp

|    | hs     | mm     | cf     | md     | gg     | xt     | dr     | tn     | ci     | cs     | dm     | ag     |
|----|--------|--------|--------|--------|--------|--------|--------|--------|--------|--------|--------|--------|
| mm | 0.0337 |        |        |        |        |        |        |        |        |        |        |        |
| cf | 0.0554 | 0.0810 |        |        |        |        |        |        |        |        |        |        |
| md | 0.1609 | 0.1777 | 0.1469 |        |        |        |        |        |        |        |        |        |
| gg | 0.1838 | 0.1833 | 0.2106 | 0.3447 |        |        |        |        |        |        |        |        |
| xt | 0.2565 | 0.2242 | 0.2644 | 0.4018 | 0.2180 |        |        |        |        |        |        |        |
| dr | 0.3874 | 0.3562 | 0.3954 | 0.5298 | 0.2821 | 0.2101 |        |        |        |        |        |        |
| tn | 0.4001 | 0.4041 | 0.3989 | 0.5458 | 0.3346 | 0.3516 | 0.2582 |        |        |        |        |        |
| ci | 0.7199 | 0.7005 | 0.6862 | 0.8135 | 0.6860 | 0.5305 | 0.4483 | 0.4740 |        |        |        |        |
| cs | 0.6646 | 0.6452 | 0.6309 | 0.7582 | 0.6333 | 0.4926 | 0.3956 | 0.4213 | 0.0969 |        |        |        |
| dm | 0.5296 | 0.5301 | 0.5137 | 0.6590 | 0.4767 | 0.4448 | 0.3024 | 0.2227 | 0.3024 | 0.2856 |        |        |
| ag | 0.6768 | 0.6885 | 0.6445 | 0.7803 | 0.6326 | 0.6284 | 0.4711 | 0.3558 | 0.2546 | 0.2401 | 0.1843 |        |
| ce | 0.6925 | 0.7037 | 0.6501 | 0.7512 | 0.6604 | 0.6604 | 0.5191 | 0.3259 | 0.3931 | 0.3239 | 0.2747 | 0.2427 |

### Coding\_2\_bp

|    | hs     | mm     | cf     | md     | gg     | xt     | dr     | tn     | ci     | cs     | dm     | ag     |
|----|--------|--------|--------|--------|--------|--------|--------|--------|--------|--------|--------|--------|
| mm | 0.0254 |        |        |        |        |        |        |        |        |        |        |        |
| cf | 0.0967 | 0.1029 |        |        |        |        |        |        |        |        |        |        |
| md | 0.1331 | 0.1315 | 0.1039 |        |        |        |        |        |        |        |        |        |
| gg | 0.1141 | 0.1139 | 0.1107 | 0.1814 |        |        |        |        |        |        |        |        |
| xt | 0.1110 | 0.0996 | 0.1122 | 0.1795 | 0.1123 |        |        |        |        |        |        |        |
| dr | 0.2016 | 0.1912 | 0.1342 | 0.2135 | 0.1507 | 0.1464 |        |        |        |        |        |        |
| tn | 0.2831 | 0.2903 | 0.2245 | 0.3034 | 0.2475 | 0.2702 | 0.1486 |        |        |        |        |        |
| ci | 0.3802 | 0.3827 | 0.3695 | 0.4600 | 0.3755 | 0.3515 | 0.2723 | 0.2620 |        |        |        |        |
| cs | 0.4327 | 0.4361 | 0.3715 | 0.4427 | 0.3925 | 0.3875 | 0.2654 | 0.2606 | 0.0778 |        |        |        |
| dm | 0.4129 | 0.4164 | 0.3573 | 0.4188 | 0.3971 | 0.3419 | 0.2508 | 0.2904 | 0.2014 | 0.1701 |        |        |
| ag | 0.6302 | 0.6298 | 0.5631 | 0.6160 | 0.6032 | 0.5611 | 0.4554 | 0.4389 | 0.2854 | 0.2473 | 0.2221 |        |
| ce | 0.5217 | 0.5288 | 0.4413 | 0.5069 | 0.4855 | 0.4967 | 0.3503 | 0.2826 | 0.2432 | 0.1699 | 0.2254 | 0.2732 |

## IFW Distances

### Intron\_2\_bp

|    | hs     | mm     | cf     | md     | gg     | xt     | dr     | tn     | ci     | cs     | dm     | ag     |
|----|--------|--------|--------|--------|--------|--------|--------|--------|--------|--------|--------|--------|
| mm | 0.0672 |        |        |        |        |        |        |        |        |        |        |        |
| cf | 0.0297 | 0.0786 |        |        |        |        |        |        |        |        |        |        |
| md | 0.1260 | 0.1615 | 0.1309 |        |        |        |        |        |        |        |        |        |
| gg | 0.2339 | 0.2187 | 0.2467 | 0.3599 |        |        |        |        |        |        |        |        |
| xt | 0.3088 | 0.2671 | 0.2985 | 0.4130 | 0.2342 |        |        |        |        |        |        |        |
| dr | 0.4545 | 0.4128 | 0.4442 | 0.5587 | 0.2846 | 0.2360 |        |        |        |        |        |        |
| tn | 0.4080 | 0.4098 | 0.4034 | 0.5340 | 0.3542 | 0.4124 | 0.3046 |        |        |        |        |        |
| ci | 0.5994 | 0.5773 | 0.5892 | 0.7121 | 0.5555 | 0.4164 | 0.3101 | 0.3333 |        |        |        |        |
| cs | 0.5456 | 0.5384 | 0.5206 | 0.6330 | 0.5152 | 0.3728 | 0.2683 | 0.3020 | 0.0876 |        |        |        |
| dm | 0.5246 | 0.5343 | 0.5162 | 0.6377 | 0.4870 | 0.4817 | 0.3190 | 0.2459 | 0.2636 | 0.2843 |        |        |
| ag | 0.6573 | 0.6934 | 0.6368 | 0.7395 | 0.6303 | 0.6556 | 0.4762 | 0.3541 | 0.3660 | 0.3460 | 0.1763 |        |
| ce | 0.6958 | 0.7232 | 0.6719 | 0.7550 | 0.6879 | 0.7370 | 0.5822 | 0.3337 | 0.4720 | 0.4712 | 0.2908 | 0.2327 |

### Upstream\_4\_bp

|    | hs     | mm     | cf     | md     | gg     | xt     | dr     | tn     | ci     | cs     | dm     | ag     |
|----|--------|--------|--------|--------|--------|--------|--------|--------|--------|--------|--------|--------|
| mm | 0.5050 |        |        |        |        |        |        |        |        |        |        |        |
| cf | 0.3620 | 0.6020 |        |        |        |        |        |        |        |        |        |        |
| md | 0.6220 | 0.6280 | 0.6670 |        |        |        |        |        |        |        |        |        |
| gg | 1.2920 | 1.5800 | 1.1900 | 1.5750 |        |        |        |        |        |        |        |        |
| xt | 1.3540 | 1.3570 | 1.2390 | 1.2480 | 1.6800 |        |        |        |        |        |        |        |
| dr | 1.1190 | 0.9510 | 1.1070 | 1.1720 | 1.8890 | 1.4060 |        |        |        |        |        |        |
| tn | 1.7660 | 1.6950 | 1.6150 | 1.8580 | 2.1400 | 1.7780 | 1.1590 |        |        |        |        |        |
| ci | 1.7730 | 1.5380 | 1.7670 | 1.5770 | 2.6330 | 1.5830 | 1.4040 | 1.9520 |        |        |        |        |
| cs | 2.4060 | 2.1950 | 2.3690 | 2.0490 | 3.2100 | 2.0180 | 1.9120 | 2.1690 | 1.0150 |        |        |        |
| dm | 2.5500 | 2.3470 | 2.4790 | 2.1010 | 3.1630 | 2.3630 | 2.2840 | 2.6920 | 1.8140 | 1.5570 |        |        |
| ag | 2.0190 | 1.9910 | 1.9080 | 1.8490 | 2.6500 | 1.7010 | 2.0070 | 2.1490 | 1.6610 | 1.6310 | 1.5720 |        |
| ce | 2.0150 | 2.1080 | 1.9450 | 1.7330 | 2.7640 | 1.5230 | 2.1010 | 2.3360 | 1.3860 | 1.7590 | 2.0060 | 1.5670 |

### Intergenic\_4\_bp

|    | hs     | mm     | cf     | md     | gg     | xt     | dr     | tn     | ci     | cs     | dm     | ag     |
|----|--------|--------|--------|--------|--------|--------|--------|--------|--------|--------|--------|--------|
| mm | 0.4090 |        |        |        |        |        |        |        |        |        |        |        |
| cf | 0.2950 | 0.5190 |        |        |        |        |        |        |        |        |        |        |
| md | 0.6650 | 0.6980 | 0.7410 |        |        |        |        |        |        |        |        |        |
| gg | 1.0500 | 1.1640 | 1.0820 | 1.4520 |        |        |        |        |        |        |        |        |
| xt | 1.4060 | 1.4190 | 1.3710 | 1.3020 | 1.5910 |        |        |        |        |        |        |        |
| dr | 1.2710 | 1.1170 | 1.2030 | 1.4130 | 1.5630 | 1.4090 |        |        |        |        |        |        |
| tn | 1.6200 | 1.5250 | 1.5840 | 1.8950 | 1.8230 | 1.7910 | 0.9960 |        |        |        |        |        |
| ci | 1.8110 | 1.6750 | 1.7180 | 1.5630 | 2.3930 | 1.5970 | 1.3390 | 1.9720 |        |        |        |        |
| cs | 2.3280 | 2.2090 | 2.3070 | 1.9710 | 2.9360 | 1.9070 | 1.7170 | 2.2860 | 0.8970 |        |        |        |
| dm | 2.2650 | 2.0700 | 2.2660 | 1.9140 | 2.9070 | 2.1520 | 2.0960 | 2.6460 | 1.7930 | 1.7100 |        |        |
| ag | 1.9800 | 1.9710 | 1.9350 | 1.7810 | 2.4430 | 1.6500 | 1.8340 | 2.1450 | 1.6570 | 1.8310 | 1.6890 |        |
| ce | 2.0340 | 2.1240 | 1.9560 | 1.7820 | 2.6320 | 1.7080 | 2.1060 | 2.3860 | 1.5900 | 1.9090 | 2.1710 | 1.6820 |

## IFW Distances

### Coding\_4\_bp

|    | hs     | mm     | cf     | md     | gg     | xt     | dr     | tn     | ci     | cs     | dm     | ag     |
|----|--------|--------|--------|--------|--------|--------|--------|--------|--------|--------|--------|--------|
| mm | 0.3850 |        |        |        |        |        |        |        |        |        |        |        |
| cf | 0.5510 | 0.5360 |        |        |        |        |        |        |        |        |        |        |
| md | 1.2430 | 1.2250 | 0.9040 |        |        |        |        |        |        |        |        |        |
| gg | 0.8480 | 0.9310 | 0.8840 | 1.4360 |        |        |        |        |        |        |        |        |
| xt | 0.8970 | 0.8540 | 0.9520 | 1.2080 | 0.9140 |        |        |        |        |        |        |        |
| dr | 1.1520 | 1.0060 | 1.0980 | 1.5810 | 1.1880 | 1.0940 |        |        |        |        |        |        |
| tn | 1.5860 | 1.4570 | 1.5090 | 1.9900 | 1.4780 | 1.5780 | 0.9670 |        |        |        |        |        |
| ci | 1.6210 | 1.6200 | 1.6830 | 2.0280 | 1.8380 | 1.5410 | 1.8620 | 2.5380 |        |        |        |        |
| cs | 1.8960 | 1.8350 | 1.8770 | 2.1130 | 2.1220 | 1.6970 | 2.0000 | 2.6890 | 0.5950 |        |        |        |
| dm | 2.2220 | 2.1450 | 2.2590 | 2.4590 | 2.4710 | 2.0070 | 2.1250 | 2.5760 | 1.6610 | 1.4230 |        |        |
| ag | 2.5450 | 2.5690 | 2.4220 | 2.4810 | 2.3650 | 2.0460 | 2.3180 | 2.6780 | 2.1830 | 2.1150 | 2.1380 |        |
| ce | 2.4460 | 2.4200 | 2.5060 | 2.4570 | 2.6640 | 2.1520 | 2.4930 | 2.9950 | 1.9470 | 1.6780 | 1.5050 | 2.5200 |

### Intron\_4\_bp

|    | hs     | mm     | cf     | md     | gg     | xt     | dr     | tn     | ci     | cs     | dm     | ag     |
|----|--------|--------|--------|--------|--------|--------|--------|--------|--------|--------|--------|--------|
| mm | 0.4380 |        |        |        |        |        |        |        |        |        |        |        |
| cf | 0.2630 | 0.4740 |        |        |        |        |        |        |        |        |        |        |
| md | 0.6110 | 0.7010 | 0.7210 |        |        |        |        |        |        |        |        |        |
| gg | 1.1230 | 1.3510 | 1.0750 | 1.5490 |        |        |        |        |        |        |        |        |
| xt | 1.6650 | 1.6030 | 1.6400 | 1.6170 | 1.8570 |        |        |        |        |        |        |        |
| dr | 1.4870 | 1.2820 | 1.4650 | 1.4470 | 1.9570 | 1.5280 |        |        |        |        |        |        |
| tn | 1.8310 | 1.7460 | 1.8230 | 1.9740 | 2.1530 | 2.0960 | 1.3700 |        |        |        |        |        |
| ci | 1.9210 | 1.7360 | 1.9780 | 1.6760 | 2.6020 | 1.5520 | 1.1590 | 2.1030 |        |        |        |        |
| cs | 2.5610 | 2.3740 | 2.6290 | 2.1220 | 3.1460 | 1.9250 | 1.6510 | 2.5110 | 1.1050 |        |        |        |
| dm | 2.5430 | 2.3690 | 2.6440 | 2.1280 | 3.1650 | 2.1910 | 1.9640 | 2.7740 | 1.7200 | 1.4250 |        |        |
| ag | 2.1590 | 2.1080 | 2.2130 | 1.9700 | 2.5880 | 1.8830 | 1.6840 | 2.2950 | 1.6250 | 1.7940 | 1.6370 |        |
| ce | 2.8480 | 2.8810 | 2.9050 | 2.4850 | 3.3210 | 2.1090 | 2.2980 | 2.8440 | 1.8400 | 1.9000 | 2.1460 | 1.9740 |

### Upstream\_8\_bp

|    | hs      | mm      | cf      | md      | gg      | xt      | dr      | tn      | ci      | cs      | dm      | ag      |
|----|---------|---------|---------|---------|---------|---------|---------|---------|---------|---------|---------|---------|
| mm | 38.6000 |         |         |         |         |         |         |         |         |         |         |         |
| cf | 35.3000 | 35.2000 |         |         |         |         |         |         |         |         |         |         |
| md | 39.6000 | 41.2000 | 38.1000 |         |         |         |         |         |         |         |         |         |
| gg | 43.2000 | 43.5000 | 41.0000 | 43.7000 |         |         |         |         |         |         |         |         |
| xt | 55.0000 | 57.3000 | 54.3000 | 56.7000 | 58.3000 |         |         |         |         |         |         |         |
| dr | 49.1000 | 45.4000 | 45.6000 | 51.7000 | 53.0000 | 56.9000 |         |         |         |         |         |         |
| tn | 40.1000 | 42.5000 | 39.8000 | 44.7000 | 47.6000 | 53.3000 | 45.0000 |         |         |         |         |         |
| ci | 51.8000 | 53.0000 | 50.2000 | 53.8000 | 57.6000 | 62.5000 | 53.4000 | 49.6000 |         |         |         |         |
| cs | 49.7000 | 47.2000 | 47.1000 | 52.3000 | 55.0000 | 61.1000 | 51.7000 | 46.6000 | 51.1000 |         |         |         |
| dm | 48.8000 | 50.8000 | 47.1000 | 48.2000 | 52.9000 | 62.6000 | 50.5000 | 48.1000 | 53.9000 | 50.9000 |         |         |
| ag | 51.9000 | 52.8000 | 50.6000 | 51.4000 | 56.0000 | 60.2000 | 51.5000 | 47.9000 | 53.9000 | 54.0000 | 47.7000 |         |
| ce | 60.9000 | 61.4000 | 60.2000 | 58.8000 | 63.9000 | 68.2000 | 60.0000 | 58.1000 | 64.4000 | 60.2000 | 58.3000 | 58.0000 |

## IFW Distances

### Intergenic\_8\_bp

|    | hs      | mm      | cf      | md      | gg      | xt      | dr      | tn      | ci      | cs      | dm      | ag      |
|----|---------|---------|---------|---------|---------|---------|---------|---------|---------|---------|---------|---------|
| mm | 52.3000 |         |         |         |         |         |         |         |         |         |         |         |
| cf | 55.5000 | 54.1000 |         |         |         |         |         |         |         |         |         |         |
| md | 63.0000 | 65.4000 | 60.7000 |         |         |         |         |         |         |         |         |         |
| gg | 56.3000 | 51.4000 | 54.8000 | 63.4000 |         |         |         |         |         |         |         |         |
| xt | 74.8000 | 71.4000 | 68.2000 | 80.4000 | 68.3000 |         |         |         |         |         |         |         |
| dr | 61.0000 | 58.7000 | 57.4000 | 69.4000 | 57.2000 | 65.5000 |         |         |         |         |         |         |
| tn | 57.1000 | 52.6000 | 50.2000 | 63.3000 | 51.8000 | 62.7000 | 49.5000 |         |         |         |         |         |
| ci | 60.1000 | 58.1000 | 60.4000 | 70.6000 | 59.9000 | 68.0000 | 57.7000 | 52.9000 |         |         |         |         |
| cs | 63.3000 | 61.1000 | 59.0000 | 71.2000 | 60.7000 | 69.4000 | 53.4000 | 52.0000 | 57.6000 |         |         |         |
| dm | 59.5000 | 56.2000 | 56.5000 | 69.5000 | 58.4000 | 69.5000 | 54.7000 | 45.5000 | 54.2000 | 56.9000 |         |         |
| ag | 58.6000 | 58.0000 | 53.6000 | 68.4000 | 58.5000 | 67.8000 | 52.3000 | 47.8000 | 57.1000 | 51.1000 | 45.8000 |         |
| ce | 69.8000 | 67.9000 | 67.6000 | 80.3000 | 70.1000 | 75.5000 | 66.9000 | 62.6000 | 64.3000 | 64.2000 | 63.0000 | 57.6000 |

### Coding\_8\_bp

|    | hs      | mm      | cf      | md      | gg      | xt      | dr      | tn      | ci      | cs      | dm      | ag      |
|----|---------|---------|---------|---------|---------|---------|---------|---------|---------|---------|---------|---------|
| mm | 40.7000 |         |         |         |         |         |         |         |         |         |         |         |
| cf | 41.0000 | 43.7000 |         |         |         |         |         |         |         |         |         |         |
| md | 50.8000 | 48.3000 | 43.6000 |         |         |         |         |         |         |         |         |         |
| gg | 40.2000 | 44.0000 | 41.6000 | 49.8000 |         |         |         |         |         |         |         |         |
| xt | 48.8000 | 45.3000 | 48.7000 | 53.3000 | 45.6000 |         |         |         |         |         |         |         |
| dr | 50.4000 | 51.1000 | 53.3000 | 58.5000 | 49.6000 | 48.0000 |         |         |         |         |         |         |
| tn | 51.2000 | 53.5000 | 48.6000 | 55.5000 | 51.0000 | 52.5000 | 51.1000 |         |         |         |         |         |
| ci | 54.9000 | 53.2000 | 57.8000 | 61.5000 | 52.0000 | 50.7000 | 53.9000 | 61.3000 |         |         |         |         |
| cs | 47.1000 | 47.1000 | 50.1000 | 56.3000 | 45.6000 | 45.4000 | 49.8000 | 57.8000 | 44.3000 |         |         |         |
| dm | 48.9000 | 48.6000 | 51.8000 | 56.5000 | 51.7000 | 47.6000 | 54.0000 | 53.4000 | 57.3000 | 49.6000 |         |         |
| ag | 63.2000 | 63.0000 | 64.7000 | 67.4000 | 63.0000 | 62.4000 | 60.5000 | 65.6000 | 60.9000 | 58.1000 | 60.8000 |         |
| ce | 52.6000 | 56.9000 | 57.3000 | 60.3000 | 55.8000 | 53.4000 | 56.4000 | 62.3000 | 60.1000 | 54.5000 | 54.8000 | 67.1000 |

### Intron\_8\_bp

|    | hs      | mm      | cf      | md      | gg      | xt      | dr      | tn      | ci      | cs      | dm      | ag      |
|----|---------|---------|---------|---------|---------|---------|---------|---------|---------|---------|---------|---------|
| mm | 51.3000 |         |         |         |         |         |         |         |         |         |         |         |
| cf | 45.2000 | 46.8000 |         |         |         |         |         |         |         |         |         |         |
| md | 49.1000 | 53.0000 | 48.4000 |         |         |         |         |         |         |         |         |         |
| gg | 53.1000 | 49.5000 | 44.1000 | 56.0000 |         |         |         |         |         |         |         |         |
| xt | 68.3000 | 69.9000 | 66.9000 | 66.1000 | 66.9000 |         |         |         |         |         |         |         |
| dr | 58.0000 | 60.4000 | 57.6000 | 57.0000 | 62.2000 | 68.2000 |         |         |         |         |         |         |
| tn | 52.8000 | 54.2000 | 48.5000 | 53.1000 | 54.3000 | 61.3000 | 55.7000 |         |         |         |         |         |
| ci | 60.8000 | 63.3000 | 56.8000 | 62.0000 | 62.6000 | 70.5000 | 63.0000 | 57.4000 |         |         |         |         |
| cs | 59.8000 | 59.4000 | 57.9000 | 58.6000 | 59.8000 | 72.1000 | 55.6000 | 58.1000 | 58.2000 |         |         |         |
| dm | 56.6000 | 58.4000 | 52.3000 | 55.8000 | 59.5000 | 70.5000 | 61.5000 | 53.7000 | 60.2000 | 54.2000 |         |         |
| ag | 55.8000 | 54.4000 | 50.7000 | 55.3000 | 56.5000 | 67.4000 | 55.4000 | 49.8000 | 58.8000 | 52.8000 | 49.9000 |         |
| ce | 76.9000 | 73.6000 | 71.0000 | 77.5000 | 74.9000 | 83.4000 | 75.3000 | 71.5000 | 73.9000 | 77.3000 | 75.7000 | 70.2000 |
