# Supplementary material
Source: PubMed Central journal article supplement (PMC1664695)

Protein diverg v. IFW distance (8bp) for promoters, mrna and EST aligning nucleotides removed

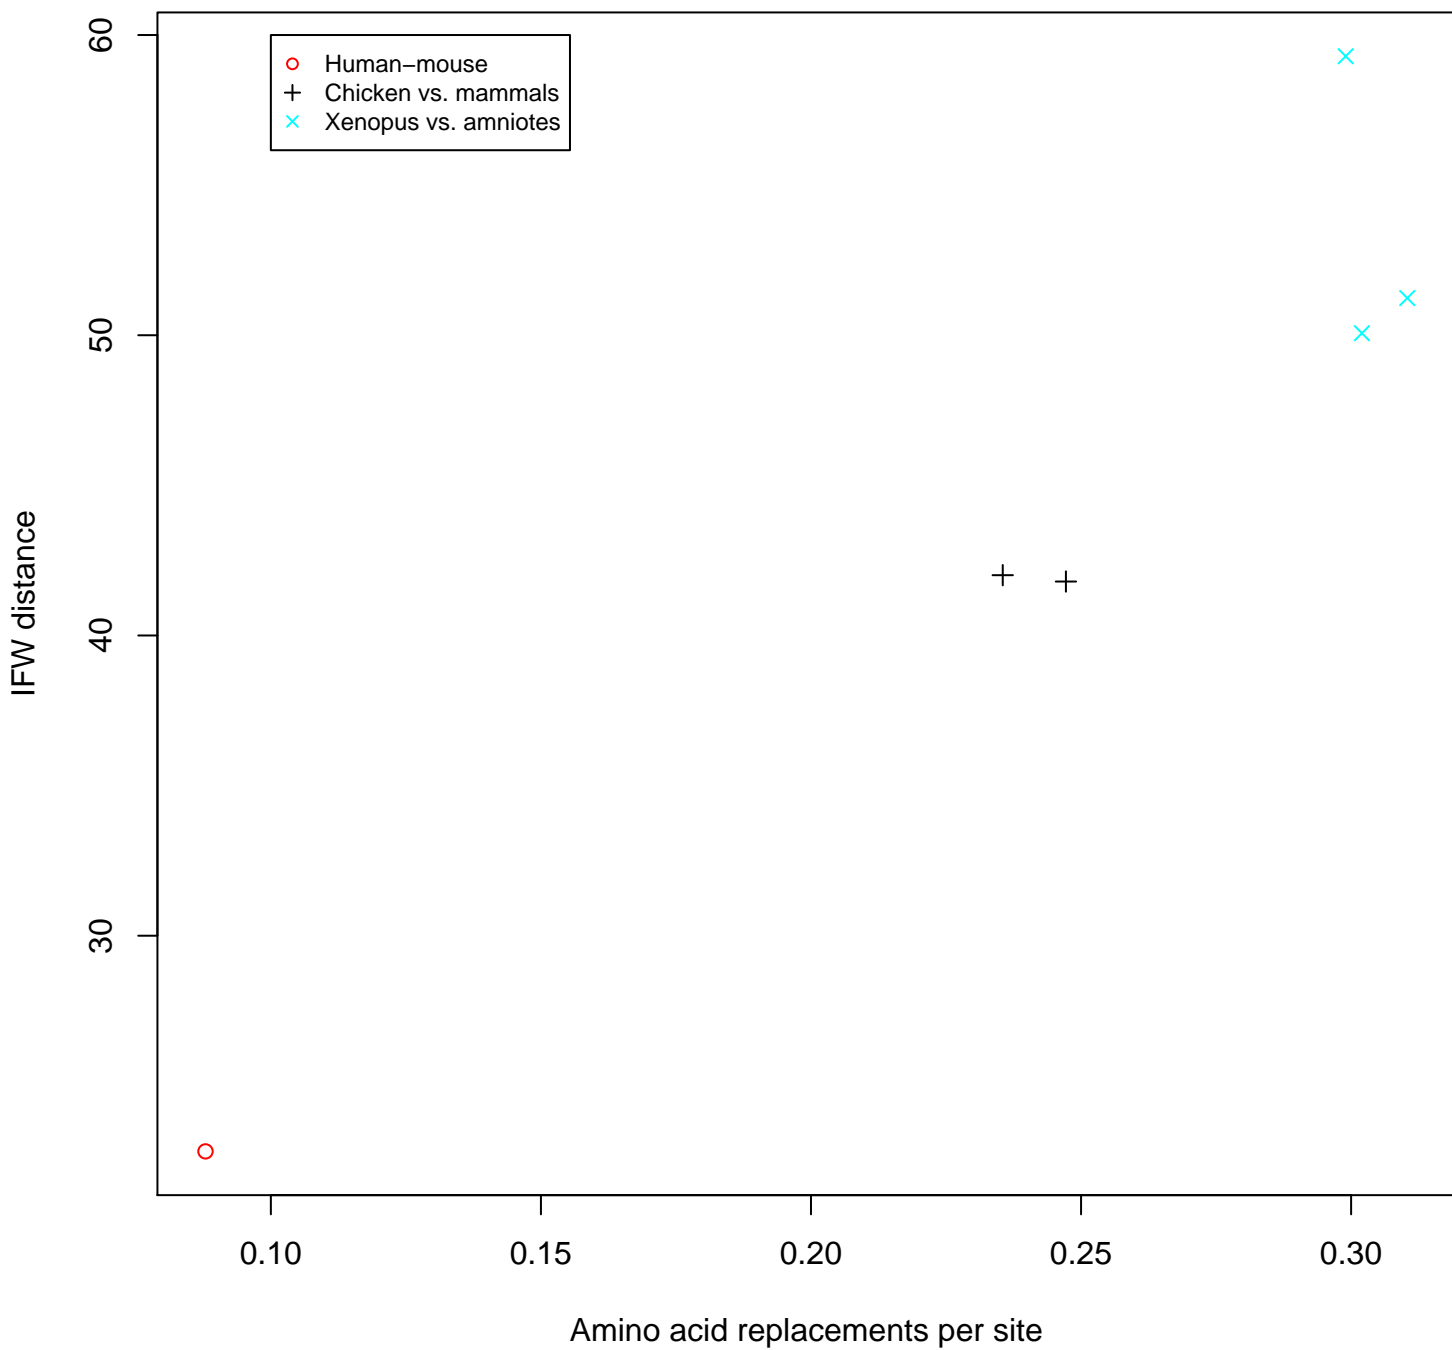

Supplement: pcbi.0020150.sg001.pdf [file pcbi.0020150.sg001.pdf]
